# Supplementary material for: Comprehensive analysis of angiogenesis pattern and related immune landscape for individual treatment in osteosarcoma
Source: PubMed Central journal article supplement (PMC10310742; doi:10.1038/s41698-023-00415-7), 2023-06-29
Supplement: 41698_2023_415_MOESM1_ESM.pdf [file 41698_2023_415_MOESM1_ESM.pdf]

**Supplementary Table 1. Hallmark of angiogenesis.**

---

| <b>Gene symbol</b> |
|--------------------|
| APOH               |
| APP                |
| CCND2              |
| COL3A1             |
| COL5A2             |
| CXCL6              |
| FGFR1              |
| FSTL1              |
| ITGAV              |
| JAG1               |
| JAG2               |
| KCNJ8              |
| LPL                |
| LRPAP1             |
| LUM                |
| MSX1               |
| NRP1               |
| OLR1               |
| PDGFA              |
| PF4                |
| PGLYRP1            |
| POSTN              |
| PRG2               |
| PTK2               |
| S100A4             |
| SERPINA5           |
| SLCO2A1            |
| SPP1               |
| STC1               |
| THBD               |
| TIMP1              |
| TNFRSF21           |
| VAV2               |
| VCAN               |
| VEGFA              |
| VTN                |

---

**Supplementary Table 2. Common cancer-related signature**

| <b>Gene Signature</b>               | <b>Genes Symbol</b>                                                                                                                                                                                                                                                                                                                                                                                                                                                                                                                                                                                                                                                                                                                                                                                                                                                                                    |
|-------------------------------------|--------------------------------------------------------------------------------------------------------------------------------------------------------------------------------------------------------------------------------------------------------------------------------------------------------------------------------------------------------------------------------------------------------------------------------------------------------------------------------------------------------------------------------------------------------------------------------------------------------------------------------------------------------------------------------------------------------------------------------------------------------------------------------------------------------------------------------------------------------------------------------------------------------|
| <b>CD8 T effector</b>               | CD8A, CXCL10, CXCL9, GZMA, GZMB, IFNG, PRF1, TBX21                                                                                                                                                                                                                                                                                                                                                                                                                                                                                                                                                                                                                                                                                                                                                                                                                                                     |
| <b>DNA damage repair</b>            | ALKBH2, ALKBH3, APEX1, APEX2, APLF, ATM, ATR, ATRIP, BLM, BRCA1, BRCA2, BRIP1, CCNH, CDK7, CETN2, CHAF1A, CHEK1, CHEK2, CLK2, DCLRE1C, DDB1, DDB2, DUT, ENDOV, ERCC1, ERCC2, ERCC3, ERCC4, ERCC5, ERCC6, ERCC8, FAN1, FANCA, FANCB, FANCC, FANCD2, FANCE, FANCF, FANCG, FANCL, FANCM, GTF2H1, GTF2H2, GTF2H3, GTF2H4, GTF2H5, H2AFX, HLTF, HUS1, LIG1, LIG3, LIG4, MBD4, MDC1, MGMT, MLH1, MLH3, MMS19, MNAT1, MPG, MSH2, MSH3, MSH4, MSH5, MSH6, MUTYH, NEIL1, NEIL2, NEIL3, NHEJ1, NTHL1, NUDT1, OGG1, PALB2, PARP1, PARP2, PARP3, PCNA, PER1, PMS1, PMS2, PNKP, POLB, POLD1, POLE, POLG, POLH, POLL, POLM, POLQ, PRKDC, RAD1, RAD17, RAD18, RAD23A, RAD23B, RAD51C, RAD9A, RECQL4, RECQL5, RIF1, RNF168, RNF4, RNF8, RPA1, RPA2, RPA3, RPA4, RRM2B, SETMAR, SHPRH, SMUG1, TDP1, TDP2, TOPBP1, TP53, TREX1, UBE2A, UBE2B, UBE2N, UBE2V2, UNG, UVSSA, WRN, XAB2, XPA, XPC, XRCC1, XRCC4, XRCC5, XRCC6 |
| <b>Pan-F-TBRS</b>                   | ACTA2, ACTG2, ADAM12, ADAM19, CNN1, COL4A1, CTGF, CTPS1, FAM101B, FSTL3, HSPB1, IGFBP3, PXDC1, SEMA7A, SH3PXD2A, TAGLN, TGFB1, TNS1, TPM1                                                                                                                                                                                                                                                                                                                                                                                                                                                                                                                                                                                                                                                                                                                                                              |
| <b>Antigen processing machinery</b> | B2M, HLA-A, HLA-B, HLA-C, TAP1, TAP2                                                                                                                                                                                                                                                                                                                                                                                                                                                                                                                                                                                                                                                                                                                                                                                                                                                                   |
| <b>Immune checkpoint</b>            | CD274, CTLA4, HAVCR2, LAG3, PDCD1, PDCD1LG2, TIGIT                                                                                                                                                                                                                                                                                                                                                                                                                                                                                                                                                                                                                                                                                                                                                                                                                                                     |
| <b>EMT1</b>                         | CLDN3, CLDN7, CLDN4, CDH1, VIM, TWIST1, ZEB1, ZEB2                                                                                                                                                                                                                                                                                                                                                                                                                                                                                                                                                                                                                                                                                                                                                                                                                                                     |
| <b>EMT2</b>                         | AXL, FAP, LOXL2, ROR2, TAGLN, TWIST2, WNT5A                                                                                                                                                                                                                                                                                                                                                                                                                                                                                                                                                                                                                                                                                                                                                                                                                                                            |
| <b>EMT3</b>                         | FOXF1, GATA6, SOX9, TWIST1, ZEB1, ZEB2                                                                                                                                                                                                                                                                                                                                                                                                                                                                                                                                                                                                                                                                                                                                                                                                                                                                 |
| <b>FGFR3-related genes</b>          | FGFR3, TP63, WNT7B                                                                                                                                                                                                                                                                                                                                                                                                                                                                                                                                                                                                                                                                                                                                                                                                                                                                                     |
| <b>KEGG discovered histones</b>     | HIST1H2AG, HIST1H2AI, HIST1H2BL, HIST2H2BF                                                                                                                                                                                                                                                                                                                                                                                                                                                                                                                                                                                                                                                                                                                                                                                                                                                             |
| <b>Fanconi anemia</b>               | APITD1, ATR, ATRIP, BLM, BRCA1, BRCA2, BRIP1, C17orf70, C19orf40, EME1, EME2, ERCC1, ERCC4, FAN1, FANCA, FANCB, FANCC, FANCD2, FANCE, FANCF, FANCG, FANCI, FANCL, FANCM, HES1, MLH1, MUS81, PALB2, PMS2, POLH, POLI, POLK, POLN, RAD51, RAD51C, REV1, REV3L, RMI1,                                                                                                                                                                                                                                                                                                                                                                                                                                                                                                                                                                                                                                     |

|                                   |                                                                                                                                                                                                                                                                                                                                                                                                                                                                                                                                                                                                                                                                                                                                                                                                                                                                          |
|-----------------------------------|--------------------------------------------------------------------------------------------------------------------------------------------------------------------------------------------------------------------------------------------------------------------------------------------------------------------------------------------------------------------------------------------------------------------------------------------------------------------------------------------------------------------------------------------------------------------------------------------------------------------------------------------------------------------------------------------------------------------------------------------------------------------------------------------------------------------------------------------------------------------------|
|                                   | RMI2, RPA1, RPA2, RPA3, RPA4, SLX4, STRA13, TELO2, TOP3A, TOP3B, UBE2T, USP1, WDR48                                                                                                                                                                                                                                                                                                                                                                                                                                                                                                                                                                                                                                                                                                                                                                                      |
| <b>Cell cycle</b>                 | ABL1, ANAPC1, ANAPC10, ANAPC11, ANAPC13, ANAPC2, ANAPC4, ANAPC5, ANAPC7, ATM, ATR, BUB1, BUB1B, BUB3, CCNA1, CCNA2, CCNB1, CCNB2, CCNB3, CCND1, CCND2, CCND3, CCNE1, CCNE2, CCNH, CDC14A, CDC14B, CDC16, CDC20, CDC23, CDC25A, CDC25B, CDC25C, CDC26, CDC27, CDC45, CDC6, CDC7, CDK1, CDK2, CDK4, CDK6, CDK7, CDKN1A, CDKN1B, CDKN1C, CDKN2A, CDKN2B, CDKN2C, CDKN2D, CHEK1, CHEK2, CREBBP, CUL1, DBF4, E2F1, E2F2, E2F3, E2F4, E2F5, EP300, ESPL1, FZR1, GADD45A, GADD45B, GADD45G, GSK3B, HDAC1, HDAC2, MAD1L1, MAD2L1, MAD2L2, MCM2, MCM3, MCM4, MCM5, MCM6, MCM7, MDM2, MYC, ORC1, ORC2, ORC3, ORC4, ORC5, ORC6, PCNA, PKMYT1, PLK1, PRKDC, PTTG1, PTTG2, RAD21, RB1, RBL1, RBL2, RBX1, SFN, SKP1, SKP2, SMAD2, SMAD3, SMAD4, SMC1A, SMC1B, SMC3, STAG1, STAG2, TFDP1, TFDP2, TGFB1, TGFB2, TGFB3, TP53, TTK, WEE1, YWHAB, YWHAE, YWHAG, YWHAH, YWHAQ, YWHAZ, ZBTB17 |
| <b>DNA replication</b>            | DNA2, FEN1, LIG1, MCM2, MCM3, MCM4, MCM5, MCM6, MCM7, PCNA, POLA1, POLA2, POLD1, POLD2, POLD3, POLD4, POLE, POLE2, POLE3, POLE4, PRIM1, PRIM2, RFC1, RFC2, RFC3, RFC4, RFC5, RNASEH1, RNASEH2A, RNASEH2B, RNASEH2C, RPA1, RPA2, RPA3, RPA4, SSBP1                                                                                                                                                                                                                                                                                                                                                                                                                                                                                                                                                                                                                        |
| <b>Nucleotide excision repair</b> | CCNH, CDK7, CETN2, CUL4A, CUL4B, DDB1, DDB2, ERCC1, ERCC2, ERCC3, ERCC4, ERCC5, ERCC6, ERCC8, GTF2H1, GTF2H2, GTF2H3, GTF2H4, GTF2H5, LIG1, MNAT1, PCNA, POLD1, POLD2, POLD3, POLD4, POLE, POLE2, POLE3, POLE4, RAD23A, RAD23B, RBX1, RFC1, RFC2, RFC3, RFC4, RFC5, RPA1, RPA2, RPA3, RPA4, XPA, XPC                                                                                                                                                                                                                                                                                                                                                                                                                                                                                                                                                                     |
| <b>Homologous recombination</b>   | BLM, BRCA2, EME1, MRE11A, MUS81, NBN, POLD1, POLD2, POLD3, POLD4, RAD50, RAD51, RAD51B, RAD51C, RAD51D, RAD52, RAD54B, RAD54L, RPA1, RPA2, RPA3, RPA4, SHFM1, SSBP1, TOP3A, TOP3B, XRCC2, XRCC3                                                                                                                                                                                                                                                                                                                                                                                                                                                                                                                                                                                                                                                                          |
| <b>Mismatch repair</b>            | EXO1, LIG1, MLH1, MLH3, MSH2, MSH3, MSH6, PCNA, PMS2, POLD1, POLD2, POLD3, POLD4, RFC1, RFC2, RFC3, RFC4, RFC5, RPA1, RPA2, RPA3, RPA4, SSBP1                                                                                                                                                                                                                                                                                                                                                                                                                                                                                                                                                                                                                                                                                                                            |
| <b>WNT target</b>                 | EFNB3, MYC, TCF12, VEGFA                                                                                                                                                                                                                                                                                                                                                                                                                                                                                                                                                                                                                                                                                                                                                                                                                                                 |
| <b>Cell cycle regulators</b>      | ATM, CCND1, CCNE1, CDKN1A, CDKN2A, E2F3, FBXW7, MDM2, RB1, TP53                                                                                                                                                                                                                                                                                                                                                                                                                                                                                                                                                                                                                                                                                                                                                                                                          |

**Supplementary Table 3. Prognostic analysis of 32 angiogenesis-related genes using a univariate Cox regression model.**

| <b>ID</b> | <b>HR</b> | <b>95% CI</b> | <b>p.value</b> |
|-----------|-----------|---------------|----------------|
| WAS       | 0.601     | (0.405-0.893) | 0.012          |
| OPN3      | 1.46      | (1.15-1.85)   | 0.0022         |
| CYFIP2    | 1.38      | (1.09-1.76)   | 0.0077         |
| GNA15     | 0.68      | (0.471-0.982) | 0.04           |
| MMP2      | 0.711     | (0.509-0.994) | 0.046          |
| CYTH4     | 0.651     | (0.449-0.944) | 0.024          |
| ANXA13    | 2.62      | (1.63-4.23)   | 0.00007<br>3   |
| CDK6      | 0.542     | (0.366-0.803) | 0.0023         |
| PTN       | 0.809     | (0.679-0.963) | 0.017          |
| ITK       | 1.6       | (1.18-2.18)   | 0.0028         |
| NCKAP1L   | 0.558     | (0.355-0.876) | 0.011          |
| WDFY4     | 0.335     | (0.114-0.986) | 0.047          |
| LOXL1     | 0.722     | (0.572-0.911) | 0.006          |
| GFPT2     | 0.705     | (0.501-0.992) | 0.045          |
| TMCC2     | 1.61      | (1.14-2.26)   | 0.0065         |
| EGFR      | 0.635     | (0.433-0.932) | 0.021          |
| ARL11     | 0.316     | (0.117-0.852) | 0.023          |
| TSPAN18   | 0.645     | (0.463-0.9)   | 0.0098         |
| CHMP4C    | 1.31      | (1.04-1.65)   | 0.024          |
| WDR72     | 1.72      | (1.28-2.31)   | 0.00033        |
| SOST      | 1.23      | (1.08-1.39)   | 0.0015         |
| GNG4      | 1.44      | (1.14-1.84)   | 0.0028         |
| COL22A1   | 1.36      | (1.11-1.67)   | 0.0031         |
| COL8A2    | 0.809     | (0.661-0.989) | 0.039          |
| GNG12     | 0.679     | (0.482-0.958) | 0.028          |
| SYT12     | 1.56      | (1.14-2.15)   | 0.006          |
| ARSJ      | 0.546     | (0.305-0.978) | 0.042          |
| EPHB3     | 0.606     | (0.41-0.895)  | 0.012          |
| HIST3H2BB | 1.81      | (1.12-2.92)   | 0.015          |
| CACNA1E   | 2.48      | (1.2-5.11)    | 0.014          |
| IFITM5    | 1.24      | (1.03-1.48)   | 0.022          |
| CTB_4E7.1 | 1.52      | (1.19-1.93)   | 0.00072        |

**Supplementary Table 4. The Anotation cell markers of single cell data.**

| <b>Cell type</b>  | <b>Markers</b>                                                      |
|-------------------|---------------------------------------------------------------------|
| osteoblastic cell | COL1A1, CDH11, RUNX2, ALPL                                          |
| Osteoclast        | CTSK, MMP9, ACP5                                                    |
| Myeloid cells     | LYZ, CD68, CD74, CD14, FCGR3A                                       |
| Fibroblast        | COL1A1, LUM, DCN, VIM                                               |
| Myoblast          | MYLPF, MYL1                                                         |
| TIL               | IL7R, CD3D, NKG7, CD2, CD3E, CD3G, GNLY, KLRD1, KLRB1, MS4A1, CD79A |
| Endothelial cell  | PECAM1, VWF, EGFL7, PLVAP                                           |

**Reference**

Zhou Y, Yang D, Yang Q, et al. Single-cell RNA landscape of intratumoral heterogeneity and immunosuppressive microenvironment in advanced osteosarcoma. *Nat Commun.* 2020 Dec 10;11(1):6322.

Liu Y, Feng W, Dai Y, et al. Single-Cell Transcriptomics Reveals the Complexity of the Tumor Microenvironment of Treatment-Naive Osteosarcoma. *Front Oncol.* 2021 Jul 21;11:709210.















|      |     |     |     |     |     |     |     |     |     |     |     |     |     |     |     |     |     |     |     |     |     |     |     |     |     |     |     |     |     |     |     |     |     |     |     |     |     |     |     |     |     |     |     |     |     |     |     |     |     |     |     |     |     |     |     |     |     |     |     |     |     |     |     |     |     |     |     |     |     |     |     |     |     |     |     |     |     |     |     |     |     |     |     |     |     |     |     |     |     |     |     |     |     |     |     |     |     |     |     |     |     |     |     |     |     |     |     |     |     |     |     |     |     |     |     |     |     |     |     |     |     |     |     |     |     |     |     |     |     |     |     |     |     |     |     |     |     |     |     |     |     |     |     |     |     |     |     |     |     |     |     |     |     |     |     |     |     |     |     |     |     |     |     |     |     |     |     |     |     |     |     |     |     |     |     |     |     |     |     |     |     |     |     |     |     |     |     |     |     |     |     |     |     |     |     |     |     |     |     |     |     |     |     |     |     |     |     |     |     |     |     |     |     |     |     |     |     |     |     |     |     |     |     |     |     |     |     |     |     |     |     |     |     |     |     |     |     |     |     |     |     |     |     |     |     |     |     |     |     |     |     |     |     |     |     |     |     |     |     |     |     |     |     |     |     |     |     |     |     |     |     |     |     |     |     |     |     |     |     |     |     |     |     |     |     |     |     |     |     |     |     |     |     |     |     |     |     |     |     |     |     |     |     |     |     |     |     |     |     |     |     |     |     |     |     |     |     |     |     |     |     |     |     |     |     |     |     |     |     |     |     |     |     |     |     |     |     |     |     |     |     |     |     |     |     |     |     |     |     |     |     |     |     |     |     |     |     |     |     |     |     |     |     |     |     |     |     |     |     |     |     |     |     |     |     |     |     |     |     |     |     |     |     |     |     |     |     |     |     |     |     |     |     |     |     |     |     |     |     |     |     |     |     |     |     |     |     |     |     |     |     |     |     |     |     |     |     |     |     |     |     |     |     |     |     |     |     |     |     |     |     |     |     |     |     |     |     |     |     |     |     |     |     |     |     |     |     |     |     |     |     |     |     |     |     |     |     |     |     |     |     |     |     |     |     |     |     |     |     |     |     |     |     |     |     |     |     |     |     |     |     |     |     |     |     |     |     |     |     |     |     |     |     |     |     |     |     |     |     |     |     |     |     |     |     |     |     |     |     |     |     |     |     |     |     |     |     |     |     |     |     |     |     |     |     |     |     |     |     |     |     |     |     |     |     |     |     |     |     |     |     |     |     |     |     |     |     |     |     |     |     |     |     |     |     |     |     |     |     |     |     |     |     |     |     |     |     |     |     |     |     |     |     |     |     |     |     |     |     |     |     |     |     |     |     |     |     |     |     |     |     |     |     |     |     |     |     |     |     |     |     |     |     |     |     |     |     |     |     |     |     |     |     |     |     |     |     |     |     |     |     |     |     |     |     |     |     |     |     |     |     |     |     |     |     |     |     |     |     |     |     |     |     |     |     |     |     |     |     |     |     |     |     |     |     |     |     |     |     |     |     |     |     |     |     |     |     |     |     |     |     |     |     |     |     |     |     |     |     |     |     |     |     |     |     |     |     |     |     |     |     |     |     |     |     |     |     |     |     |     |     |     |     |     |     |     |     |     |     |     |     |     |     |     |     |     |     |     |     |     |     |     |     |     |     |     |     |     |     |     |     |     |     |     |     |     |     |     |     |     |     |     |     |     |     |     |     |     |     |     |     |     |     |     |     |     |     |     |     |     |     |     |     |     |     |     |      |
|------|-----|-----|-----|-----|-----|-----|-----|-----|-----|-----|-----|-----|-----|-----|-----|-----|-----|-----|-----|-----|-----|-----|-----|-----|-----|-----|-----|-----|-----|-----|-----|-----|-----|-----|-----|-----|-----|-----|-----|-----|-----|-----|-----|-----|-----|-----|-----|-----|-----|-----|-----|-----|-----|-----|-----|-----|-----|-----|-----|-----|-----|-----|-----|-----|-----|-----|-----|-----|-----|-----|-----|-----|-----|-----|-----|-----|-----|-----|-----|-----|-----|-----|-----|-----|-----|-----|-----|-----|-----|-----|-----|-----|-----|-----|-----|-----|-----|-----|-----|-----|-----|-----|-----|-----|-----|-----|-----|-----|-----|-----|-----|-----|-----|-----|-----|-----|-----|-----|-----|-----|-----|-----|-----|-----|-----|-----|-----|-----|-----|-----|-----|-----|-----|-----|-----|-----|-----|-----|-----|-----|-----|-----|-----|-----|-----|-----|-----|-----|-----|-----|-----|-----|-----|-----|-----|-----|-----|-----|-----|-----|-----|-----|-----|-----|-----|-----|-----|-----|-----|-----|-----|-----|-----|-----|-----|-----|-----|-----|-----|-----|-----|-----|-----|-----|-----|-----|-----|-----|-----|-----|-----|-----|-----|-----|-----|-----|-----|-----|-----|-----|-----|-----|-----|-----|-----|-----|-----|-----|-----|-----|-----|-----|-----|-----|-----|-----|-----|-----|-----|-----|-----|-----|-----|-----|-----|-----|-----|-----|-----|-----|-----|-----|-----|-----|-----|-----|-----|-----|-----|-----|-----|-----|-----|-----|-----|-----|-----|-----|-----|-----|-----|-----|-----|-----|-----|-----|-----|-----|-----|-----|-----|-----|-----|-----|-----|-----|-----|-----|-----|-----|-----|-----|-----|-----|-----|-----|-----|-----|-----|-----|-----|-----|-----|-----|-----|-----|-----|-----|-----|-----|-----|-----|-----|-----|-----|-----|-----|-----|-----|-----|-----|-----|-----|-----|-----|-----|-----|-----|-----|-----|-----|-----|-----|-----|-----|-----|-----|-----|-----|-----|-----|-----|-----|-----|-----|-----|-----|-----|-----|-----|-----|-----|-----|-----|-----|-----|-----|-----|-----|-----|-----|-----|-----|-----|-----|-----|-----|-----|-----|-----|-----|-----|-----|-----|-----|-----|-----|-----|-----|-----|-----|-----|-----|-----|-----|-----|-----|-----|-----|-----|-----|-----|-----|-----|-----|-----|-----|-----|-----|-----|-----|-----|-----|-----|-----|-----|-----|-----|-----|-----|-----|-----|-----|-----|-----|-----|-----|-----|-----|-----|-----|-----|-----|-----|-----|-----|-----|-----|-----|-----|-----|-----|-----|-----|-----|-----|-----|-----|-----|-----|-----|-----|-----|-----|-----|-----|-----|-----|-----|-----|-----|-----|-----|-----|-----|-----|-----|-----|-----|-----|-----|-----|-----|-----|-----|-----|-----|-----|-----|-----|-----|-----|-----|-----|-----|-----|-----|-----|-----|-----|-----|-----|-----|-----|-----|-----|-----|-----|-----|-----|-----|-----|-----|-----|-----|-----|-----|-----|-----|-----|-----|-----|-----|-----|-----|-----|-----|-----|-----|-----|-----|-----|-----|-----|-----|-----|-----|-----|-----|-----|-----|-----|-----|-----|-----|-----|-----|-----|-----|-----|-----|-----|-----|-----|-----|-----|-----|-----|-----|-----|-----|-----|-----|-----|-----|-----|-----|-----|-----|-----|-----|-----|-----|-----|-----|-----|-----|-----|-----|-----|-----|-----|-----|-----|-----|-----|-----|-----|-----|-----|-----|-----|-----|-----|-----|-----|-----|-----|-----|-----|-----|-----|-----|-----|-----|-----|-----|-----|-----|-----|-----|-----|-----|-----|-----|-----|-----|-----|-----|-----|-----|-----|-----|-----|-----|-----|-----|-----|-----|-----|-----|-----|-----|-----|-----|-----|-----|-----|-----|-----|-----|-----|-----|-----|-----|-----|-----|-----|-----|-----|-----|-----|-----|-----|-----|-----|-----|-----|-----|-----|-----|-----|-----|-----|-----|-----|-----|-----|-----|-----|-----|-----|-----|-----|-----|-----|-----|-----|-----|-----|-----|-----|-----|-----|-----|-----|-----|-----|-----|-----|-----|-----|-----|-----|-----|-----|-----|-----|-----|-----|-----|-----|-----|-----|-----|-----|-----|-----|-----|-----|-----|-----|-----|-----|-----|-----|-----|-----|-----|-----|-----|-----|-----|-----|-----|-----|-----|-----|-----|-----|-----|-----|-----|-----|-----|-----|-----|-----|-----|-----|-----|-----|-----|-----|-----|-----|-----|-----|-----|-----|-----|-----|-----|-----|-----|-----|-----|-----|-----|-----|-----|-----|-----|-----|-----|-----|-----|-----|-----|-----|-----|-----|-----|-----|-----|-----|-----|-----|-----|-----|-----|-----|-----|-----|-----|-----|-----|-----|-----|-----|-----|-----|-----|-----|-----|-----|-----|-----|-----|-----|-----|-----|-----|-----|-----|-----|------|
| Drug | 234 | 235 | 236 | 237 | 238 | 239 | 240 | 241 | 242 | 243 | 244 | 245 | 246 | 247 | 248 | 249 | 250 | 251 | 252 | 253 | 254 | 255 | 256 | 257 | 258 | 259 | 260 | 261 | 262 | 263 | 264 | 265 | 266 | 267 | 268 | 269 | 270 | 271 | 272 | 273 | 274 | 275 | 276 | 277 | 278 | 279 | 280 | 281 | 282 | 283 | 284 | 285 | 286 | 287 | 288 | 289 | 290 | 291 | 292 | 293 | 294 | 295 | 296 | 297 | 298 | 299 | 300 | 301 | 302 | 303 | 304 | 305 | 306 | 307 | 308 | 309 | 310 | 311 | 312 | 313 | 314 | 315 | 316 | 317 | 318 | 319 | 320 | 321 | 322 | 323 | 324 | 325 | 326 | 327 | 328 | 329 | 330 | 331 | 332 | 333 | 334 | 335 | 336 | 337 | 338 | 339 | 340 | 341 | 342 | 343 | 344 | 345 | 346 | 347 | 348 | 349 | 350 | 351 | 352 | 353 | 354 | 355 | 356 | 357 | 358 | 359 | 360 | 361 | 362 | 363 | 364 | 365 | 366 | 367 | 368 | 369 | 370 | 371 | 372 | 373 | 374 | 375 | 376 | 377 | 378 | 379 | 380 | 381 | 382 | 383 | 384 | 385 | 386 | 387 | 388 | 389 | 390 | 391 | 392 | 393 | 394 | 395 | 396 | 397 | 398 | 399 | 400 | 401 | 402 | 403 | 404 | 405 | 406 | 407 | 408 | 409 | 410 | 411 | 412 | 413 | 414 | 415 | 416 | 417 | 418 | 419 | 420 | 421 | 422 | 423 | 424 | 425 | 426 | 427 | 428 | 429 | 430 | 431 | 432 | 433 | 434 | 435 | 436 | 437 | 438 | 439 | 440 | 441 | 442 | 443 | 444 | 445 | 446 | 447 | 448 | 449 | 450 | 451 | 452 | 453 | 454 | 455 | 456 | 457 | 458 | 459 | 460 | 461 | 462 | 463 | 464 | 465 | 466 | 467 | 468 | 469 | 470 | 471 | 472 | 473 | 474 | 475 | 476 | 477 | 478 | 479 | 480 | 481 | 482 | 483 | 484 | 485 | 486 | 487 | 488 | 489 | 490 | 491 | 492 | 493 | 494 | 495 | 496 | 497 | 498 | 499 | 500 | 501 | 502 | 503 | 504 | 505 | 506 | 507 | 508 | 509 | 510 | 511 | 512 | 513 | 514 | 515 | 516 | 517 | 518 | 519 | 520 | 521 | 522 | 523 | 524 | 525 | 526 | 527 | 528 | 529 | 530 | 531 | 532 | 533 | 534 | 535 | 536 | 537 | 538 | 539 | 540 | 541 | 542 | 543 | 544 | 545 | 546 | 547 | 548 | 549 | 550 | 551 | 552 | 553 | 554 | 555 | 556 | 557 | 558 | 559 | 560 | 561 | 562 | 563 | 564 | 565 | 566 | 567 | 568 | 569 | 570 | 571 | 572 | 573 | 574 | 575 | 576 | 577 | 578 | 579 | 580 | 581 | 582 | 583 | 584 | 585 | 586 | 587 | 588 | 589 | 590 | 591 | 592 | 593 | 594 | 595 | 596 | 597 | 598 | 599 | 600 | 601 | 602 | 603 | 604 | 605 | 606 | 607 | 608 | 609 | 610 | 611 | 612 | 613 | 614 | 615 | 616 | 617 | 618 | 619 | 620 | 621 | 622 | 623 | 624 | 625 | 626 | 627 | 628 | 629 | 630 | 631 | 632 | 633 | 634 | 635 | 636 | 637 | 638 | 639 | 640 | 641 | 642 | 643 | 644 | 645 | 646 | 647 | 648 | 649 | 650 | 651 | 652 | 653 | 654 | 655 | 656 | 657 | 658 | 659 | 660 | 661 | 662 | 663 | 664 | 665 | 666 | 667 | 668 | 669 | 670 | 671 | 672 | 673 | 674 | 675 | 676 | 677 | 678 | 679 | 680 | 681 | 682 | 683 | 684 | 685 | 686 | 687 | 688 | 689 | 690 | 691 | 692 | 693 | 694 | 695 | 696 | 697 | 698 | 699 | 700 | 701 | 702 | 703 | 704 | 705 | 706 | 707 | 708 | 709 | 710 | 711 | 712 | 713 | 714 | 715 | 716 | 717 | 718 | 719 | 720 | 721 | 722 | 723 | 724 | 725 | 726 | 727 | 728 | 729 | 730 | 731 | 732 | 733 | 734 | 735 | 736 | 737 | 738 | 739 | 740 | 741 | 742 | 743 | 744 | 745 | 746 | 747 | 748 | 749 | 750 | 751 | 752 | 753 | 754 | 755 | 756 | 757 | 758 | 759 | 760 | 761 | 762 | 763 | 764 | 765 | 766 | 767 | 768 | 769 | 770 | 771 | 772 | 773 | 774 | 775 | 776 | 777 | 778 | 779 | 780 | 781 | 782 | 783 | 784 | 785 | 786 | 787 | 788 | 789 | 790 | 791 | 792 | 793 | 794 | 795 | 796 | 797 | 798 | 799 | 800 | 801 | 802 | 803 | 804 | 805 | 806 | 807 | 808 | 809 | 810 | 811 | 812 | 813 | 814 | 815 | 816 | 817 | 818 | 819 | 820 | 821 | 822 | 823 | 824 | 825 | 826 | 827 | 828 | 829 | 830 | 831 | 832 | 833 | 834 | 835 | 836 | 837 | 838 | 839 | 840 | 841 | 842 | 843 | 844 | 845 | 846 | 847 | 848 | 849 | 850 | 851 | 852 | 853 | 854 | 855 | 856 | 857 | 858 | 859 | 860 | 861 | 862 | 863 | 864 | 865 | 866 | 867 | 868 | 869 | 870 | 871 | 872 | 873 | 874 | 875 | 876 | 877 | 878 | 879 | 880 | 881 | 882 | 883 | 884 | 885 | 886 | 887 | 888 | 889 | 890 | 891 | 892 | 893 | 894 | 895 | 896 | 897 | 898 | 899 | 900 | 901 | 902 | 903 | 904 | 905 | 906 | 907 | 908 | 909 | 910 | 911 | 912 | 913 | 914 | 915 | 916 | 917 | 918 | 919 | 920 | 921 | 922 | 923 | 924 | 925 | 926 | 927 | 928 | 929 | 930 | 931 | 932 | 933 | 934 | 935 | 936 | 937 | 938 | 939 | 940 | 941 | 942 | 943 | 944 | 945 | 946 | 947 | 948 | 949 | 950 | 951 | 952 | 953 | 954 | 955 | 956 | 957 | 958 | 959 | 960 | 961 | 962 | 963 | 964 | 965 | 966 | 967 | 968 | 969 | 970 | 971 | 972 | 973 | 974 | 975 | 976 | 977 | 978 | 979 | 980 | 981 | 982 | 983 | 984 | 985 | 986 | 987 | 988 | 989 | 990 | 991 | 992 | 993 | 994 | 995 | 996 | 997 | 998 | 999 | 1000 |
|------|-----|-----|-----|-----|-----|-----|-----|-----|-----|-----|-----|-----|-----|-----|-----|-----|-----|-----|-----|-----|-----|-----|-----|-----|-----|-----|-----|-----|-----|-----|-----|-----|-----|-----|-----|-----|-----|-----|-----|-----|-----|-----|-----|-----|-----|-----|-----|-----|-----|-----|-----|-----|-----|-----|-----|-----|-----|-----|-----|-----|-----|-----|-----|-----|-----|-----|-----|-----|-----|-----|-----|-----|-----|-----|-----|-----|-----|-----|-----|-----|-----|-----|-----|-----|-----|-----|-----|-----|-----|-----|-----|-----|-----|-----|-----|-----|-----|-----|-----|-----|-----|-----|-----|-----|-----|-----|-----|-----|-----|-----|-----|-----|-----|-----|-----|-----|-----|-----|-----|-----|-----|-----|-----|-----|-----|-----|-----|-----|-----|-----|-----|-----|-----|-----|-----|-----|-----|-----|-----|-----|-----|-----|-----|-----|-----|-----|-----|-----|-----|-----|-----|-----|-----|-----|-----|-----|-----|-----|-----|-----|-----|-----|-----|-----|-----|-----|-----|-----|-----|-----|-----|-----|-----|-----|-----|-----|-----|-----|-----|-----|-----|-----|-----|-----|-----|-----|-----|-----|-----|-----|-----|-----|-----|-----|-----|-----|-----|-----|-----|-----|-----|-----|-----|-----|-----|-----|-----|-----|-----|-----|-----|-----|-----|-----|-----|-----|-----|-----|-----|-----|-----|-----|-----|-----|-----|-----|-----|-----|-----|-----|-----|-----|-----|-----|-----|-----|-----|-----|-----|-----|-----|-----|-----|-----|-----|-----|-----|-----|-----|-----|-----|-----|-----|-----|-----|-----|-----|-----|-----|-----|-----|-----|-----|-----|-----|-----|-----|-----|-----|-----|-----|-----|-----|-----|-----|-----|-----|-----|-----|-----|-----|-----|-----|-----|-----|-----|-----|-----|-----|-----|-----|-----|-----|-----|-----|-----|-----|-----|-----|-----|-----|-----|-----|-----|-----|-----|-----|-----|-----|-----|-----|-----|-----|-----|-----|-----|-----|-----|-----|-----|-----|-----|-----|-----|-----|-----|-----|-----|-----|-----|-----|-----|-----|-----|-----|-----|-----|-----|-----|-----|-----|-----|-----|-----|-----|-----|-----|-----|-----|-----|-----|-----|-----|-----|-----|-----|-----|-----|-----|-----|-----|-----|-----|-----|-----|-----|-----|-----|-----|-----|-----|-----|-----|-----|-----|-----|-----|-----|-----|-----|-----|-----|-----|-----|-----|-----|-----|-----|-----|-----|-----|-----|-----|-----|-----|-----|-----|-----|-----|-----|-----|-----|-----|-----|-----|-----|-----|-----|-----|-----|-----|-----|-----|-----|-----|-----|-----|-----|-----|-----|-----|-----|-----|-----|-----|-----|-----|-----|-----|-----|-----|-----|-----|-----|-----|-----|-----|-----|-----|-----|-----|-----|-----|-----|-----|-----|-----|-----|-----|-----|-----|-----|-----|-----|-----|-----|-----|-----|-----|-----|-----|-----|-----|-----|-----|-----|-----|-----|-----|-----|-----|-----|-----|-----|-----|-----|-----|-----|-----|-----|-----|-----|-----|-----|-----|-----|-----|-----|-----|-----|-----|-----|-----|-----|-----|-----|-----|-----|-----|-----|-----|-----|-----|-----|-----|-----|-----|-----|-----|-----|-----|-----|-----|-----|-----|-----|-----|-----|-----|-----|-----|-----|-----|-----|-----|-----|-----|-----|-----|-----|-----|-----|-----|-----|-----|-----|-----|-----|-----|-----|-----|-----|-----|-----|-----|-----|-----|-----|-----|-----|-----|-----|-----|-----|-----|-----|-----|-----|-----|-----|-----|-----|-----|-----|-----|-----|-----|-----|-----|-----|-----|-----|-----|-----|-----|-----|-----|-----|-----|-----|-----|-----|-----|-----|-----|-----|-----|-----|-----|-----|-----|-----|-----|-----|-----|-----|-----|-----|-----|-----|-----|-----|-----|-----|-----|-----|-----|-----|-----|-----|-----|-----|-----|-----|-----|-----|-----|-----|-----|-----|-----|-----|-----|-----|-----|-----|-----|-----|-----|-----|-----|-----|-----|-----|-----|-----|-----|-----|-----|-----|-----|-----|-----|-----|-----|-----|-----|-----|-----|-----|-----|-----|-----|-----|-----|-----|-----|-----|-----|-----|-----|-----|-----|-----|-----|-----|-----|-----|-----|-----|-----|-----|-----|-----|-----|-----|-----|-----|-----|-----|-----|-----|-----|-----|-----|-----|-----|-----|-----|-----|-----|-----|-----|-----|-----|-----|-----|-----|-----|-----|-----|-----|-----|-----|-----|-----|-----|-----|-----|-----|-----|-----|-----|-----|-----|-----|-----|-----|-----|-----|-----|-----|-----|-----|-----|-----|-----|-----|-----|-----|-----|-----|-----|-----|-----|-----|-----|-----|-----|-----|-----|-----|-----|-----|-----|-----|-----|-----|-----|-----|-----|-----|-----|-----|-----|-----|-----|-----|-----|-----|-----|-----|-----|-----|-----|-----|------|

























**Supplementary Table 7. The drug names and corresponding targets**

| <b>Drug Name</b> | <b>Pathway Name</b>               | <b>Targets</b>                                       |
|------------------|-----------------------------------|------------------------------------------------------|
| MN-64            | WNT signaling                     | TNKS1, TNKS2                                         |
| Venetoclax       | Apoptosis regulation              | BCL2                                                 |
| AGI-5198         | Metabolism                        | IDH1 (R132H)                                         |
| AZD3759          | EGFR signaling                    | EGFR                                                 |
| NVP-ADW742       | IGF1R signaling                   | IGF1R                                                |
| P22077           | Protein stability and degradation | USP7, USP47                                          |
| WEHI-539         | Apoptosis regulation              | BCL-XL                                               |
| Foretinib        | RTK signaling                     | MET, KDR, TIE2, VEGFR3/FLT4, RON, PDGFR, FGFR1, EGFR |
| Rapamycin        | PI3K/MTOR signaling               | MTORC1                                               |
| PRIMA-1MET       | p53 pathway                       | TP53 activation                                      |
| Talazoparib      | Genome integrity                  | PARP1, PARP2                                         |
| Trametinib       | ERK MAPK signaling                | MEK1, MEK2                                           |
| Luminespib       | Protein stability and degradation | HSP90                                                |
| CZC24832         | PI3K/MTOR signaling               | PI3Kgamma                                            |
| PFI3             | Chromatin other                   | Polybromo 1, SMARCA4, SMARCA2                        |
| Wnt-C59          | WNT signaling                     | PORCN                                                |
| OTX015           | Chromatin other                   | BRD2, BRD3, BRD4                                     |
| AGI-6780         | Metabolism                        | IDH2 R140Q mutant                                    |
| IRAK4_4710       | Other, kinases                    | IRAK4                                                |
| Uprosertib       | PI3K/MTOR signaling               | AKT1, AKT2, AKT3                                     |
| Olaparib         | Genome integrity                  | PARP1, PARP2                                         |
| Axitinib         | RTK signaling                     | PDGFR, KIT, VEGFR                                    |
| Buparlisib       | PI3K/MTOR signaling               | PI3Kalpha, PI3Kdelta, PI3Kbeta, PI3Kgamma            |
| Afuresertib      | PI3K/MTOR signaling               | AKT1, AKT2, AKT3                                     |
| Osimertinib      | EGFR signaling                    | EGFR                                                 |
| Savolitinib      | RTK signaling                     | MET                                                  |



|                         |                               |                                            |
|-------------------------|-------------------------------|--------------------------------------------|
| Pyridostatin            | DNA replication               | G-quadruplex stabiliser                    |
| Ulixertinib             | ERK MAPK signaling            | ERK1, ERK2                                 |
| Vinorelbine             | Mitosis                       | Microtubule destabiliser                   |
| ZM447439                | Mitosis                       | AURKA, AURKB                               |
| AZD8055                 | PI3K/MTOR signaling           | MTORC1, MTORC2                             |
| Crizotinib              | RTK signaling                 | MET, ALK, ROS1                             |
| Temozolomide            | DNA replication               | DNA alkylating agent                       |
| AZD1208                 | Other, kinases                | PIM1, PIM2, PIM3                           |
| LCL161                  | Apoptosis regulation          | XIAP, IAP1, IAP2                           |
| Vincristine             | -                             | -                                          |
| Podophyllotoxin bromide | Unclassified                  | -                                          |
| OSI-027                 | PI3K/MTOR signaling           | MTORC1, MTORC2                             |
| Ibrutinib               | Other, kinases                | BTK                                        |
| Docetaxel               | Mitosis                       | Microtubule stabiliser                     |
| Vorinostat              | Chromatin histone acetylation | HDAC inhibitor Class I, IIa, IIb, IV       |
| Gallibiscoquinazole     | Unclassified                  | -                                          |
| OF-1                    | Chromatin histone acetylation | BRPF1B, BRPF2                              |
| Cediranib               | RTK signaling                 | VEGFR, FLT1, FLT2, FLT3, FLT4, KIT, PDGFRB |
| Telomerase Inhibitor IX | Genome integrity              | Telomerase                                 |
| UMI-77                  | Apoptosis regulation          | MCL1                                       |
| Sepantronium bromide    | Apoptosis regulation          | BIRC5                                      |
| MIM1                    | Apoptosis regulation          | MCL1                                       |
| 5-Fluorouracil          | Other                         | Antimetabolite (DNA & RNA)                 |
| Niraparib               | Genome integrity              | PARP1, PARP2                               |
| BMS-345541              | Other                         | IKK-1, IKK-2                               |
| XAV939                  | WNT signaling                 | TNKS1, TNKS2                               |
| AZD1332                 | RTK signaling                 | NTRK1, NTRK2, NTRK3                        |
| Sapitinib               | EGFR signaling                | EGFR, ERBB2, ERBB3                         |
| Taselisib               | PI3K/MTOR signaling           | PI3K (beta sparing)                        |
| Staurosporine           | RTK signaling                 | Broad spectrum kinase inhibitor            |
| NU7441                  | Genome integrity              | DNAPK                                      |

|                    |                      |                                  |
|--------------------|----------------------|----------------------------------|
| ULK1_4989          | Other, kinases       | ULK1                             |
| VSP34_8731         | Other                | VSP34                            |
| BMS-754807         | IGF1R signaling      | IGF1R, IR                        |
| Camptothecin       | DNA replication      | TOP1                             |
| Vinblastine        | Mitosis              | Microtubule destabiliser         |
| Gefitinib          | EGFR signaling       | EGFR                             |
| SB216763           | WNT signaling        | GSK3A, GSK3B                     |
| Daporinad          | Metabolism           | NAMPT                            |
| Tozasertib         | Mitosis              | AURKA, AURKB, AURKC, others      |
| ABT737             | Apoptosis regulation | BCL2, BCL-XL, BCL-W, BCL-B, BFL1 |
| Dactinomycin       | Other                | RNA polymerase                   |
| GNE-317            | PI3K/MTOR signaling  | PI3Kalpha                        |
| WIKI4              | WNT signaling        | TNKS1, TNKS2                     |
| AMG-319            | PI3K/MTOR signaling  | PI3K (beta sparing)              |
| Pictilisib         | PI3K/MTOR signaling  | PI3K (class 1)                   |
| Sorafenib          | Other, kinases       | PDGFR, KIT, VEGFR, RAF           |
| Oxaliplatin        | DNA replication      | DNA alkylating agent             |
| GSK1904529A        | IGF1R signaling      | IGF1R, IR                        |
| Erlotinib          | EGFR signaling       | EGFR                             |
| MK-1775            | Cell cycle           | WEE1, PLK1                       |
| Gemcitabine        | DNA replication      | Pyrimidine antimetabolite        |
| YK-4-279           | Other                | RNA helicase A                   |
| Teniposide         | DNA replication      | -                                |
| Fulvestrant        | Hormone-related      | ESR                              |
| CDK9_5576          | Cell cycle           | CDK9                             |
| IGF1R_3801         | IGF1R signaling      | IGFR1                            |
| JAK_8517           | Other, kinases       | JAK1, JAK2                       |
| Zoledronate        | Other                |                                  |
| AT13148            | PI3K/MTOR signaling  | AKT1                             |
| AZD7762            | Cell cycle           | CHEK1, CHEK2                     |
| AZD6482            | PI3K/MTOR signaling  | PI3Kbeta                         |
| SB505124           | RTK signaling        | TGFBR1, ACVR1B, ACVR1C           |
| Obatoclox Mesylate | Apoptosis regulation | BCL2, BCL-XL, BCL-W, MCL1        |
| Dinaciclib         | Cell cycle           | CDK1, CDK2, CDK5, CDK9           |

|                 |                                   |                                |
|-----------------|-----------------------------------|--------------------------------|
| Fulvestrant     | Hormone-related                   | ESR                            |
| AZ960           | Other, kinases                    | JAK2, JAK3                     |
| Alpelisib       | PI3K/MTOR signaling               | PI3Kalpha                      |
| Wee1 Inhibitor  | Cell cycle                        | WEE1, CHEK1                    |
| Nelarabine      | DNA replication                   | -                              |
| Dihydrorotenone | Unclassified                      | -                              |
| PRT062607       | Other, kinases                    | SYK                            |
| Ribociclib      | Cell cycle                        | CDK4, CDK6                     |
| Picolinici-acid | Other                             | Inflammatory related           |
| PAK_5339        | Cytoskeleton                      | PAK1, PAK2                     |
| Acetalax        | Unclassified                      | -                              |
| GSK591          | Chromatin histone methylation     | PMRT5                          |
| VE821           | Genome integrity                  | ATR                            |
| JQ1             | Chromatin other                   | BRD2, BRD3, BRD4, BRDT         |
| Navitoclax      | Apoptosis regulation              | BCL2, BCL-XL, BCL-W            |
| Elephantin      | Unclassified                      | -                              |
| Sinularin       | Unclassified                      | -                              |
| Sabutoclax      | Apoptosis regulation              | BCL2, BCL-XL, BFL1, MCL1       |
| AZD5363         | Other, kinases                    | AKT1, AKT2, AKT3, ROCK2        |
| GSK2578215A     | Other, kinases                    | LRRK2                          |
| MK-8776         | Cell cycle                        | CHEK1, CHEK2, CDK2             |
| Mirin           | Genome integrity                  | MRE11                          |
| Alisertib       | Mitosis                           | AURKA                          |
| Dactolisib      | PI3K/MTOR signaling               | PI3K (class 1), MTORC1, MTORC2 |
| Selumetinib     | ERK MAPK signaling                | MEK1, MEK2                     |
| BMS-536924      | IGF1R signaling                   | IGF1R, IR                      |
| Bortezomib      | Protein stability and degradation | Proteasome                     |
| EPZ004777       | Chromatin histone methylation     | DOT1L                          |
| Dabrafenib      | ERK MAPK signaling                | BRAF                           |
| Pevonedistat    | Other                             | NAE                            |
| PLX-4720        | ERK MAPK signaling                | BRAF                           |
| LGK974          | WNT signaling                     | PORCN                          |
| VE-822          | Genome integrity                  | ATR                            |
| GSK2606414      | Metabolism                        | PERK                           |

|                          |                                   |                      |
|--------------------------|-----------------------------------|----------------------|
| ML323                    | Protein stability and degradation | USP1, UAF1           |
| JAK1_8709                | Other, kinases                    | JAK1                 |
| TAF1_5496                | Other                             | TAF1                 |
| Oxaliplatin              | DNA replication                   | DNA alkylating agent |
| Nilotinib                | ABL signaling                     | ABL                  |
| Afatinib                 | EGFR signaling                    | EGFR, ERBB2          |
| LY2109761                | Other                             | TGFB1                |
| MG-132                   | Protein stability and degradation | Proteasome, CAPN1    |
| BDP-00009066             | Cytoskeleton                      | MRCKB_HUMAN          |
| AZD8186                  | PI3K/MTOR signaling               | PI3Kalpha, PI3Kbeta  |
| Ipatasertib              | PI3K/MTOR signaling               | AKT1, AKT, AKT3      |
| GDC0810                  | Hormone-related                   | ESR1, ESR2           |
| BPD-00008900             | Other                             | -                    |
| GSK343                   | Chromatin histone methylation     | EZH2                 |
| BIBR-1532                | Genome integrity                  | TERT                 |
| Nutlin-3a (-)            | p53 pathway                       | MDM2                 |
| Tamoxifen                | Hormone-related                   | ESR1                 |
| Cyclophosphamide         | DNA replication                   | Alkylating agent     |
| Lapatinib                | EGFR signaling                    | EGFR, ERBB2          |
| Topotecan                | DNA replication                   | TOP1                 |
| Mitoxantrone             | DNA replication                   | TOP2                 |
| Dactinomycin             | Other                             | RNA polymerase       |
| AZD5582                  | Apoptosis regulation              | XIAP, cIAP           |
| I-BET-762                | Chromatin other                   | BRD2, BRD3, BRD4     |
| AZD5153                  | Chromatin other                   | BRD4                 |
| Eg5_9814                 | Other                             | KSP11                |
| ERK_2440                 | ERK MAPK signaling                | ERK1, ERK2           |
| AZD5991                  | Apoptosis regulation              | MCL1                 |
| AZ6102                   | WNT signaling                     | TNKS1, TNKS2         |
| Cisplatin                | DNA replication                   | DNA crosslinker      |
| Cytarabine               | Other                             | Antimetabolite       |
| KRAS (G12C) Inhibitor-12 | ERK MAPK signaling                | KRAS (G12C)          |
| Ulixertinib              | ERK MAPK signaling                | ERK1, ERK2           |
| AZD6738                  | Genome integrity                  | ATR                  |
| I-BRD9                   | Chromatin other                   | BRD9                 |
| MIRA-1                   | p53 pathway                       | TP53                 |
| PD173074                 | RTK signaling                     | FGFR1, FGFR2, FGFR3  |

|               |                               |                                   |
|---------------|-------------------------------|-----------------------------------|
| RO-3306       | Cell cycle                    | CDK1                              |
| MK-2206       | PI3K/MTOR signaling           | AKT1, AKT2                        |
| Palbociclib   | Cell cycle                    | CDK4, CDK6                        |
| PD0325901     | ERK MAPK signaling            | MEK1, MEK2                        |
| Dasatinib     | Other, kinases                | ABL, SRC, Ephrins,<br>PDGFR, KIT  |
| Paclitaxel    | Mitosis                       | Microtubule<br>stabiliser         |
| BI-2536       | Cell cycle                    | PLK1, PLK2, PLK3                  |
| Irinotecan    | DNA replication               | TOP1                              |
| AZD5438       | Cell cycle                    | CDK2                              |
| IAP_5620      | Other                         | IAP                               |
| AZD2014       | PI3K/MTOR signaling           | mTORC1,<br>mTORC2                 |
| Ruxolitinib   | Other, kinases                | JAK1, JAK2                        |
| Linsitinib    | IGF1R signaling               | IGF1R                             |
| Epirubicin    | DNA replication               | Anthracycline                     |
| Uprosertib    | PI3K/MTOR signaling           | AKT1, AKT2, AKT3                  |
| Doramapimod   | JNK and p38 signaling         | p38, JNK2                         |
| Fludarabine   | DNA replication               | Antimetabolite                    |
| Docetaxel     | Mitosis                       | Microtubule<br>stabiliser         |
| EPZ5676       | Chromatin histone methylation | DOT1L                             |
| SCH772984     | ERK MAPK signaling            | ERK1, ERK2                        |
| IWP-2         | WNT signaling                 | PORCN                             |
| Leflunomide   | DNA replication               | Pyrimidine<br>synthesis inhibitor |
| Entinostat    | Chromatin histone acetylation | HDAC1, HDAC3                      |
| WZ4003        | Other, kinases                | NUAK1, NUAK2                      |
| PCI-34051     | Chromatin histone acetylation | HDAC8, HDAC6,<br>HDAC1            |
| RVX-208       | Chromatin other               | BRD4                              |
| Entospletinib | Other, kinases                | SYK                               |
| CDK9_5038     | Cell cycle                    | CDK9                              |
| ERK_6604      | ERK MAPK signaling            | ERK1, ERK2                        |
| AZD4547       | RTK signaling                 | FGFR1, FGFR2,<br>FGFR3            |
| Carmustine    | -                             | -                                 |
| VX-11e        | ERK MAPK signaling            | ERK2                              |
| LJI308        | PI3K/MTOR signaling           | RSK2, RSK1, RSK3                  |
| KU-55933      | Genome integrity              | ATM                               |
| PF-4708671    | PI3K/MTOR signaling           | S6K1                              |
| GSK269962A    | Cytoskeleton                  | ROCK1, ROCK2                      |

**Supplementary Table 8. The samples included in the analyses**

| <b>TARGET-OS cohort</b> | <b>GSE21257 cohort</b> |
|-------------------------|------------------------|
| TARGET-40-PASKZZ-01A    | GSM530667              |
| TARGET-40-PALWWX-01A    | GSM530899              |
| TARGET-40-PAMEKS-01A    | GSM531283              |
| TARGET-40-PAMLKS-01A    | GSM531284              |
| TARGET-40-PAMRHD-01A    | GSM531285              |
| TARGET-40-PAMYYJ-01A    | GSM531286              |
| TARGET-40-PANMIG-01A    | GSM531287              |
| TARGET-40-PANPUM-01A    | GSM531288              |
| TARGET-40-PANZHX-01A    | GSM531289              |
| TARGET-40-PAPIJR-01A    | GSM531290              |
| TARGET-40-PAPKWD-01A    | GSM531292              |
| TARGET-40-PAPNVD-01A    | GSM531293              |
| TARGET-40-PAPWWC-01A    | GSM531295              |
| TARGET-40-PAPXGT-01A    | GSM531296              |
| TARGET-40-PARBGW-01A    | GSM531297              |
| TARGET-40-PARDAX-01A    | GSM531299              |
| TARGET-40-PARFTG-01A    | GSM531300              |
| TARGET-40-PARGTM-01A    | GSM531301              |
| TARGET-40-PARJXU-01A    | GSM531302              |
| TARGET-40-PARKAF-01A    | GSM531303              |
| TARGET-40-PASEBY-01A    | GSM531305              |
| TARGET-40-PASEFS-01A    | GSM531306              |
| TARGET-40-PASFCV-01A    | GSM531307              |
| TARGET-40-PASSLM-01A    | GSM531308              |
| TARGET-40-PASUUH-01A    | GSM531309              |
| TARGET-40-PASYUK-01A    | GSM531310              |
| TARGET-40-PATAWV-01A    | GSM531311              |
| TARGET-40-PATJVI-01A    | GSM531312              |
| TARGET-40-PATKSS-01A    | GSM531313              |
| TARGET-40-PATMIF-01A    | GSM531319              |
| TARGET-40-PATMPU-01A    | GSM531320              |
| TARGET-40-PATPBS-01A    | GSM531321              |
| TARGET-40-PASNZV-01A    | GSM531322              |
| TARGET-40-PASRNE-01A    | GSM531323              |
| TARGET-40-PATEEM-01A    | GSM531324              |
| TARGET-40-PATUXZ-01A    | GSM531325              |
| TARGET-40-PAUBIT-01A    | GSM531326              |
| TARGET-40-PAUTWB-01A    | GSM531327              |
| TARGET-40-PAUTYB-01A    | GSM531328              |
| TARGET-40-PAUUML-01A    | GSM531329              |
| TARGET-40-PAUVUL-01A    | GSM531330              |
| TARGET-40-PAUXPZ-01A    | GSM531331              |

|                      |           |
|----------------------|-----------|
| TARGET-40-PAUYTT-01A | GSM531332 |
| TARGET-40-PAVALD-01A | GSM531333 |
| TARGET-40-PAVCLP-01A | GSM531334 |
| TARGET-40-PAVDTY-01A | GSM531335 |
| TARGET-40-PAVECB-01A | GSM531351 |
| TARGET-40-PATMXR-01A |           |
| TARGET-40-0A4HLD-01A |           |
| TARGET-40-0A4HMC-01A |           |
| TARGET-40-0A4HX8-01A |           |
| TARGET-40-0A4HXS-01A |           |
| TARGET-40-0A4HY5-01A |           |
| TARGET-40-0A4I0Q-01A |           |
| TARGET-40-0A4I0W-01A |           |
| TARGET-40-0A4I3S-01A |           |
| TARGET-40-0A4I42-01A |           |
| TARGET-40-0A4I48-01A |           |
| TARGET-40-0A4I4M-01A |           |
| TARGET-40-0A4I4O-01A |           |
| TARGET-40-0A4I5B-01A |           |
| TARGET-40-0A4I6O-01A |           |
| TARGET-40-0A4I8U-01A |           |
| TARGET-40-PAKFVX-01A |           |
| TARGET-40-PAKXLD-01A |           |
| TARGET-40-PAKZZK-01A |           |
| TARGET-40-PALECC-01A |           |
| TARGET-40-PALFYN-01A |           |
| TARGET-40-PALHRL-01A |           |
| TARGET-40-PALKDP-01A |           |
| TARGET-40-PALKGN-01A |           |
| TARGET-40-PALZGU-01A |           |
| TARGET-40-PAMHLF-01A |           |
| TARGET-40-PAMHYN-01A |           |
| TARGET-40-PAMJXS-01A |           |
| TARGET-40-PAMTCM-01A |           |
| TARGET-40-PANGPE-01A |           |
| TARGET-40-PANGRW-01A |           |
| TARGET-40-PANSEN-01A |           |
| TARGET-40-PANVJJ-01A |           |
| TARGET-40-PANXSC-01A |           |
| TARGET-40-PANZZJ-01A |           |
| TARGET-40-0A4I65-01A |           |
| TARGET-40-0A4I9K-01A |           |

---

**Supplementary Table 9. The cancer immunity cycle and representative genes**

| <b>Genes</b> | <b>Steps</b> | <b>Cycle</b>                | <b>Type</b> | <b>Immune cell type</b> |
|--------------|--------------|-----------------------------|-------------|-------------------------|
| IL10         | 1            | Release of cancer antigens  | positive    | Multiple                |
| TGFB1        | 1            | Release of cancer antigens  | positive    | Multiple                |
| HMGB1        | 1            | Release of cancer antigens  | positive    | Multiple                |
| ANXA1        | 1            | Release of cancer antigens  | positive    | Multiple                |
| CALR         | 1            | Release of cancer antigens  | positive    | Multiple                |
| CXCL10       | 1            | Release of cancer antigens  | positive    | Multiple                |
| PDIA3        | 1            | Release of cancer antigens  | positive    | Multiple                |
| HSPA1A       | 1            | Release of cancer antigens  | positive    | Multiple                |
| HSPA1B       | 1            | Release of cancer antigens  | positive    | Multiple                |
| HSPA2        | 1            | Release of cancer antigens  | positive    | Multiple                |
| HSPA8        | 1            | Release of cancer antigens  | positive    | Multiple                |
| HSPA4        | 1            | Release of cancer antigens  | positive    | Multiple                |
| HSPA14       | 1            | Release of cancer antigens  | positive    | Multiple                |
| HSPA5        | 1            | Release of cancer antigens  | positive    | Multiple                |
| HSPA6        | 1            | Release of cancer antigens  | positive    | Multiple                |
| HSPA9        | 1            | Release of cancer antigens  | positive    | Multiple                |
| HSPA13       | 1            | Release of cancer antigens  | positive    | Multiple                |
| HSPA7        | 1            | Release of cancer antigens  | positive    | Multiple                |
| HSPA8        | 1            | Release of cancer antigens  | positive    | Multiple                |
| HSPA12A      | 1            | Release of cancer antigens  | positive    | Multiple                |
| HSPA12B      | 1            | Release of cancer antigens  | positive    | Multiple                |
| HSP90AA1     | 1            | Release of cancer antigens  | positive    | Multiple                |
| HSP90AB1     | 1            | Release of cancer antigens  | positive    | Multiple                |
| HSP90B1      | 1            | Release of cancer antigens  | positive    | Multiple                |
| IFNA2        | 1            | Release of cancer antigens  | positive    | Multiple                |
| IFNA1        | 1            | Release of cancer antigens  | positive    | Multiple                |
| IFNA13       | 1            | Release of cancer antigens  | positive    | Multiple                |
| IFNA6        | 1            | Release of cancer antigens  | positive    | Multiple                |
| IFNA21       | 1            | Release of cancer antigens  | positive    | Multiple                |
| IFNA4        | 1            | Release of cancer antigens  | positive    | Multiple                |
| IFNA8        | 1            | Release of cancer antigens  | positive    | Multiple                |
| IFNA5        | 1            | Release of cancer antigens  | positive    | Multiple                |
| IFNA7        | 1            | Release of cancer antigens  | positive    | Multiple                |
| IFNA14       | 1            | Release of cancer antigens  | positive    | Multiple                |
| IFNA16       | 1            | Release of cancer antigens  | positive    | Multiple                |
| IFNA10       | 1            | Release of cancer antigens  | positive    | Multiple                |
| IFNA17       | 1            | Release of cancer antigens  | positive    | Multiple                |
| IFNB1        | 1            | Release of cancer antigens  | positive    | Multiple                |
| IFNE         | 1            | Release of cancer antigens  | positive    | Multiple                |
| IFNW1        | 1            | Release of cancer antigens  | positive    | Multiple                |
| TNF          | 2            | Cancer antigen presentation | positive    | Multiple                |



|         |   |                             |          |          |
|---------|---|-----------------------------|----------|----------|
| IL1A    | 2 | Cancer antigen presentation | positive | Multiple |
| IL1B    | 2 | Cancer antigen presentation | positive | Multiple |
| IFNA2   | 2 | Cancer antigen presentation | positive | Multiple |
| IFNA1   | 2 | Cancer antigen presentation | positive | Multiple |
| IFNA13  | 2 | Cancer antigen presentation | positive | Multiple |
| IFNA6   | 2 | Cancer antigen presentation | positive | Multiple |
| IFNA21  | 2 | Cancer antigen presentation | positive | Multiple |
| IFNA4   | 2 | Cancer antigen presentation | positive | Multiple |
| IFNA8   | 2 | Cancer antigen presentation | positive | Multiple |
| IFNA5   | 2 | Cancer antigen presentation | positive | Multiple |
| IFNA7   | 2 | Cancer antigen presentation | positive | Multiple |
| IFNA14  | 2 | Cancer antigen presentation | positive | Multiple |
| IFNA16  | 2 | Cancer antigen presentation | positive | Multiple |
| IFNA10  | 2 | Cancer antigen presentation | positive | Multiple |
| IFNA17  | 2 | Cancer antigen presentation | positive | Multiple |
| CD40LG  | 2 | Cancer antigen presentation | positive | Multiple |
| CD40    | 2 | Cancer antigen presentation | positive | Multiple |
| NT5C    | 2 | Cancer antigen presentation | positive | Multiple |
| HMGB1   | 2 | Cancer antigen presentation | positive | Multiple |
| TLR1    | 2 | Cancer antigen presentation | positive | Multiple |
| TLR2    | 2 | Cancer antigen presentation | positive | Multiple |
| TLR3    | 2 | Cancer antigen presentation | positive | Multiple |
| TLR4    | 2 | Cancer antigen presentation | positive | Multiple |
| TLR5    | 2 | Cancer antigen presentation | positive | Multiple |
| TLR6    | 2 | Cancer antigen presentation | positive | Multiple |
| TLR7    | 2 | Cancer antigen presentation | positive | Multiple |
| TLR8    | 2 | Cancer antigen presentation | positive | Multiple |
| TLR9    | 2 | Cancer antigen presentation | positive | Multiple |
| TLR10   | 2 | Cancer antigen presentation | positive | Multiple |
| HCAA    | 2 | Cancer antigen presentation | positive | Multiple |
| B2M     | 2 | Cancer antigen presentation | positive | Multiple |
| TAP1    | 2 | Cancer antigen presentation | positive | Multiple |
| IL10    | 2 | Cancer antigen presentation | negative | Multiple |
| IL4     | 2 | Cancer antigen presentation | negative | Multiple |
| IL13    | 2 | Cancer antigen presentation | negative | Multiple |
| CD3D    | 3 | Priming and activation      | positive | Multiple |
| CD3E    | 3 | Priming and activation      | positive | Multiple |
| CD3G    | 3 | Priming and activation      | positive | Multiple |
| CD247   | 3 | Priming and activation      | positive | Multiple |
| CD28    | 3 | Priming and activation      | positive | Multiple |
| TNFRSF9 | 3 | Priming and activation      | positive | Multiple |
| TNFSF9  | 3 | Priming and activation      | positive | Multiple |
| TNFRSF4 | 3 | Priming and activation      | positive | Multiple |
| TNFSF4  | 3 | Priming and activation      | positive | Multiple |

|          |   |                        |          |          |
|----------|---|------------------------|----------|----------|
| CD27     | 3 | Priming and activation | positive | Multiple |
| CD70     | 3 | Priming and activation | positive | Multiple |
| TNFRSF14 | 3 | Priming and activation | positive | Multiple |
| TNFSF14  | 3 | Priming and activation | positive | Multiple |
| CD40     | 3 | Priming and activation | positive | Multiple |
| CD40LG   | 3 | Priming and activation | positive | Multiple |
| TNFRSF18 | 3 | Priming and activation | positive | Multiple |
| TNFSF18  | 3 | Priming and activation | positive | Multiple |
| TNFRSF25 | 3 | Priming and activation | positive | Multiple |
| TNFSF15  | 3 | Priming and activation | positive | Multiple |
| TNFRSF8  | 3 | Priming and activation | positive | Multiple |
| TNFSF8   | 3 | Priming and activation | positive | Multiple |
| HAVCR1   | 3 | Priming and activation | positive | Multiple |
| TIMD4    | 3 | Priming and activation | positive | Multiple |
| SLAMF7   | 3 | Priming and activation | positive | Multiple |
| SLAMF6   | 3 | Priming and activation | positive | Multiple |
| SLAMF1   | 3 | Priming and activation | positive | Multiple |
| SLAMF9   | 3 | Priming and activation | positive | Multiple |
| SLAMF8   | 3 | Priming and activation | positive | Multiple |
| CD2      | 3 | Priming and activation | positive | Multiple |
| CD48     | 3 | Priming and activation | positive | Multiple |
| CD58     | 3 | Priming and activation | positive | Multiple |
| CD226    | 3 | Priming and activation | positive | Multiple |
| ICOS     | 3 | Priming and activation | positive | Multiple |
| ICOSLG   | 3 | Priming and activation | positive | Multiple |
| KLRK1    | 3 | Priming and activation | positive | Multiple |
| MICA     | 3 | Priming and activation | positive | Multiple |
| MICB     | 3 | Priming and activation | positive | Multiple |
| RAET1E   | 3 | Priming and activation | positive | Multiple |
| RAET1G   | 3 | Priming and activation | positive | Multiple |
| CRTAM    | 3 | Priming and activation | positive | Multiple |
| CADM1    | 3 | Priming and activation | positive | Multiple |
| CTLA4    | 3 | Priming and activation | negative | Multiple |
| PDCD1    | 3 | Priming and activation | negative | Multiple |
| PDCD1LG2 | 3 | Priming and activation | negative | Multiple |
| CD274    | 3 | Priming and activation | negative | Multiple |
| CD160    | 3 | Priming and activation | negative | Multiple |
| TNFRSF14 | 3 | Priming and activation | negative | Multiple |
| BTLA     | 3 | Priming and activation | negative | Multiple |
| VSIR     | 3 | Priming and activation | negative | Multiple |
| LAIR1    | 3 | Priming and activation | negative | Multiple |
| HAVCR1   | 3 | Priming and activation | negative | Multiple |
| HAVCR2   | 3 | Priming and activation | negative | Multiple |
| LGALS9   | 3 | Priming and activation | negative | Multiple |

|         |   |                         |          |                |
|---------|---|-------------------------|----------|----------------|
| TIMD4   | 3 | Priming and activation  | negative | Multiple       |
| CD244   | 3 | Priming and activation  | negative | Multiple       |
| CD48    | 3 | Priming and activation  | negative | Multiple       |
| TIGIT   | 3 | Priming and activation  | negative | Multiple       |
| NECTIN3 | 3 | Priming and activation  | negative | Multiple       |
| LAG3    | 3 | Priming and activation  | negative | Multiple       |
| IL2     | 3 | Priming and activation  | positive | Multiple       |
| IL12A   | 3 | Priming and activation  | positive | Multiple       |
| IL12B   | 3 | Priming and activation  | positive | Multiple       |
| CXCR5   | 4 | immune cell recruitment | positive | B cell         |
| CXCL13  | 4 | immune cell recruitment | positive | B cell         |
| CCL24   | 4 | immune cell recruitment | positive | Basophil       |
| CCL26   | 4 | immune cell recruitment | positive | Basophil       |
| CCL19   | 4 | immune cell recruitment | positive | CD4 T cell     |
| CX3CL1  | 4 | immune cell recruitment | positive | CD4 T cell     |
| CXCL16  | 4 | immune cell recruitment | positive | CD4 T cell     |
| CCR5    | 4 | immune cell recruitment | positive | CD8 T cell     |
| CXCR3   | 4 | immune cell recruitment | positive | CD8 T cell     |
| CXCL10  | 4 | immune cell recruitment | positive | CD8 T cell     |
| CXCL9   | 4 | immune cell recruitment | positive | CD8 T cell     |
| CCL20   | 4 | immune cell recruitment | positive | CD8 T cell     |
| CXCL11  | 4 | immune cell recruitment | positive | CD8 T cell     |
| CX3CL1  | 4 | immune cell recruitment | positive | CD8 T cell     |
| CXCL16  | 4 | immune cell recruitment | positive | CD8 T cell     |
| CCR7    | 4 | immune cell recruitment | positive | Dendritic cell |
| CCL3    | 4 | immune cell recruitment | positive | Dendritic cell |
| CCL4    | 4 | immune cell recruitment | positive | Dendritic cell |
| CCL5    | 4 | immune cell recruitment | positive | Dendritic cell |
| CCL21   | 4 | immune cell recruitment | positive | Dendritic cell |
| CCL11   | 4 | immune cell recruitment | positive | Eosinophil     |
| CCL24   | 4 | immune cell recruitment | positive | Eosinophil     |
| CCL26   | 4 | immune cell recruitment | positive | Eosinophil     |
| CSF1    | 4 | immune cell recruitment | positive | Macrophage     |
| CCL2    | 4 | immune cell recruitment | positive | Macrophage     |
| CCL3    | 4 | immune cell recruitment | positive | Macrophage     |
| CCL4    | 4 | immune cell recruitment | positive | Macrophage     |
| CCL5    | 4 | immune cell recruitment | positive | Macrophage     |
| CXCR2   | 4 | immune cell recruitment | positive | MDSC           |
| CXCL5   | 4 | immune cell recruitment | positive | MDSC           |
| CCL2    | 4 | immune cell recruitment | positive | Monocyte       |
| CCL7    | 4 | immune cell recruitment | positive | Monocyte       |
| CX3CL1  | 4 | immune cell recruitment | positive | Monocyte       |
| CXCL1   | 4 | immune cell recruitment | positive | Neutrophil     |
| CXCL2   | 4 | immune cell recruitment | positive | Neutrophil     |

|        |   |                                              |          |            |
|--------|---|----------------------------------------------|----------|------------|
| CXCL3  | 4 | immune cell recruitment                      | positive | Neutrophil |
| CXCL8  | 4 | immune cell recruitment                      | positive | Neutrophil |
| CXCL6  | 4 | immune cell recruitment                      | positive | Neutrophil |
| CXCL5  | 4 | immune cell recruitment                      | positive | Neutrophil |
| CXCR3  | 4 | immune cell recruitment                      | positive | NK cell    |
| CXCL10 | 4 | immune cell recruitment                      | positive | NK cell    |
| CXCL9  | 4 | immune cell recruitment                      | positive | NK cell    |
| CCL3   | 4 | immune cell recruitment                      | positive | NK cell    |
| CCL4   | 4 | immune cell recruitment                      | positive | NK cell    |
| CCL5   | 4 | immune cell recruitment                      | positive | NK cell    |
| CXCL11 | 4 | immune cell recruitment                      | positive | NK cell    |
| CX3CL1 | 4 | immune cell recruitment                      | positive | NK cell    |
| CXCR5  | 4 | immune cell recruitment                      | positive | T cell     |
| CCR7   | 4 | immune cell recruitment                      | positive | T cell     |
| CXCL9  | 4 | immune cell recruitment                      | positive | T cell     |
| CCL3   | 4 | immune cell recruitment                      | positive | T cell     |
| CCL4   | 4 | immune cell recruitment                      | positive | T cell     |
| CCL5   | 4 | immune cell recruitment                      | positive | T cell     |
| CCL19  | 4 | immune cell recruitment                      | positive | T cell     |
| CCL21  | 4 | immune cell recruitment                      | positive | T cell     |
| CX3CL1 | 4 | immune cell recruitment                      | positive | T cell     |
| CXCL13 | 4 | immune cell recruitment                      | positive | T cell     |
| CXCR3  | 4 | immune cell recruitment                      | positive | TH1 cell   |
| CXCL10 | 4 | immune cell recruitment                      | positive | TH1 cell   |
| CXCL9  | 4 | immune cell recruitment                      | positive | TH1 cell   |
| CXCL11 | 4 | immune cell recruitment                      | positive | TH1 cell   |
| CCR6   | 4 | immune cell recruitment                      | positive | TH17 cell  |
| CCL20  | 4 | immune cell recruitment                      | positive | TH17 cell  |
| CXCL12 | 4 | immune cell recruitment                      | positive | TH17 cell  |
| CXCR4  | 4 | immune cell recruitment                      | positive | TH17 cell  |
| CCL1   | 4 | immune cell recruitment                      | positive | Th2 cell   |
| CCL17  | 4 | immune cell recruitment                      | positive | Th2 cell   |
| CCL22  | 4 | immune cell recruitment                      | positive | Th2 cell   |
| CCR6   | 4 | immune cell recruitment                      | positive | TH22 cell  |
| CCL20  | 4 | immune cell recruitment                      | positive | TH22 cell  |
| CCR4   | 4 | immune cell recruitment                      | positive | Treg cell  |
| CCR10  | 4 | immune cell recruitment                      | positive | Treg cell  |
| CCL1   | 4 | immune cell recruitment                      | positive | Treg cell  |
| CCL17  | 4 | immune cell recruitment                      | positive | Treg cell  |
| CCL22  | 4 | immune cell recruitment                      | positive | Treg cell  |
| CCL28  | 4 | immune cell recruitment                      | positive | Treg cell  |
| STAT1  | 5 | infiltration of immune cells<br>into tumours | positive | T cell     |

|         |   |                                           |          |          |
|---------|---|-------------------------------------------|----------|----------|
| IRF5    | 5 | infiltration of immune cells into tumours | positive | T cell   |
| KLF2    | 5 | infiltration of immune cells into tumours | positive | T cell   |
| ITGB2   | 5 | infiltration of immune cells into tumours | positive | T cell   |
| ICAM1   | 5 | infiltration of immune cells into tumours | negative | T cell   |
| EZH2    | 5 | infiltration of immune cells into tumours | negative | T cell   |
| DNMT1   | 5 | infiltration of immune cells into tumours | negative | T cell   |
| VEGFA   | 5 | infiltration of immune cells into tumours | negative | T cell   |
| EDNRB   | 5 | infiltration of immune cells into tumours | negative | T cell   |
| CD28    | 6 | Recognition of cancer cells by T cells    | positive | Multiple |
| ICOS    | 6 | Recognition of cancer cells by T cells    | positive | Multiple |
| ICOSLG  | 6 | Recognition of cancer cells by T cells    | positive | Multiple |
| TNFRSF9 | 6 | Recognition of cancer cells by T cells    | positive | Multiple |
| TNFSF9  | 6 | Recognition of cancer cells by T cells    | positive | Multiple |
| CD27    | 6 | Recognition of cancer cells by T cells    | positive | Multiple |
| CD70    | 6 | Recognition of cancer cells by T cells    | positive | Multiple |
| TNFRSF4 | 6 | Recognition of cancer cells by T cells    | positive | Multiple |
| TNFSF4  | 6 | Recognition of cancer cells by T cells    | positive | Multiple |
| TNFSF14 | 6 | Recognition of cancer cells by T cells    | positive | Multiple |
| CD40    | 6 | Recognition of cancer cells by T cells    | positive | Multiple |
| CD40LG  | 6 | Recognition of cancer cells by T cells    | positive | Multiple |
| HLAA    | 6 | Recognition of cancer cells by T cells    | positive | Multiple |
| B2M     | 6 | Recognition of cancer cells by T cells    | positive | Multiple |

|          |   |                                        |          |          |
|----------|---|----------------------------------------|----------|----------|
| TAP1     | 6 | Recognition of cancer cells by T cells | positive | Multiple |
| BIRC5    | 6 | Recognition of cancer cells by T cells | positive | Multiple |
| MDM2     | 6 | Recognition of cancer cells by T cells | positive | Multiple |
| MAGEA4   | 6 | Recognition of cancer cells by T cells | positive | Multiple |
| TP53     | 6 | Recognition of cancer cells by T cells | positive | Multiple |
| PDCD1    | 6 | Recognition of cancer cells by T cells | negative | Multiple |
| PDCD1LG2 | 6 | Recognition of cancer cells by T cells | negative | Multiple |
| CD274    | 6 | Recognition of cancer cells by T cells | negative | Multiple |
| CTLA4    | 6 | Recognition of cancer cells by T cells | negative | Multiple |
| BTLA     | 6 | Recognition of cancer cells by T cells | negative | Multiple |
| VTCN1    | 6 | Recognition of cancer cells by T cells | negative | Multiple |
| IFNG     | 7 | Killing of cancer cells                | positive | Multiple |
| GZMB     | 7 | Killing of cancer cells                | positive | Multiple |
| PRF1     | 7 | Killing of cancer cells                | positive | Multiple |
| PDCD1    | 7 | Killing of cancer cells                | negative | Multiple |
| SMC3     | 7 | Killing of cancer cells                | negative | Multiple |
| VTCN1    | 7 | Killing of cancer cells                | negative | Multiple |
| HAVCR2   | 7 | Killing of cancer cells                | negative | Multiple |
| MICA     | 7 | Killing of cancer cells                | negative | Multiple |
| MICB     | 7 | Killing of cancer cells                | negative | Multiple |
| BTLA     | 7 | Killing of cancer cells                | negative | Multiple |
| VSIR     | 7 | Killing of cancer cells                | negative | Multiple |
| LAG3     | 7 | Killing of cancer cells                | negative | Multiple |
| IDO1     | 7 | Killing of cancer cells                | negative | Multiple |
| IDO2     | 7 | Killing of cancer cells                | negative | Multiple |
| ARG1     | 7 | Killing of cancer cells                | negative | Multiple |
| ARG2     | 7 | Killing of cancer cells                | negative | Multiple |
| NOS1     | 7 | Killing of cancer cells                | negative | Multiple |
| NOS2     | 7 | Killing of cancer cells                | negative | Multiple |
| NOS3     | 7 | Killing of cancer cells                | negative | Multiple |
| TGFB1    | 7 | Killing of cancer cells                | negative | Multiple |
| IL10     | 7 | Killing of cancer cells                | negative | Multiple |
| CCL28    | 7 | Killing of cancer cells                | negative | Multiple |

|        |   |                         |          |          |
|--------|---|-------------------------|----------|----------|
| CXCL12 | 7 | Killing of cancer cells | negative | Multiple |
| CCL2   | 7 | Killing of cancer cells | negative | Multiple |
| CXCL8  | 7 | Killing of cancer cells | negative | Multiple |

---

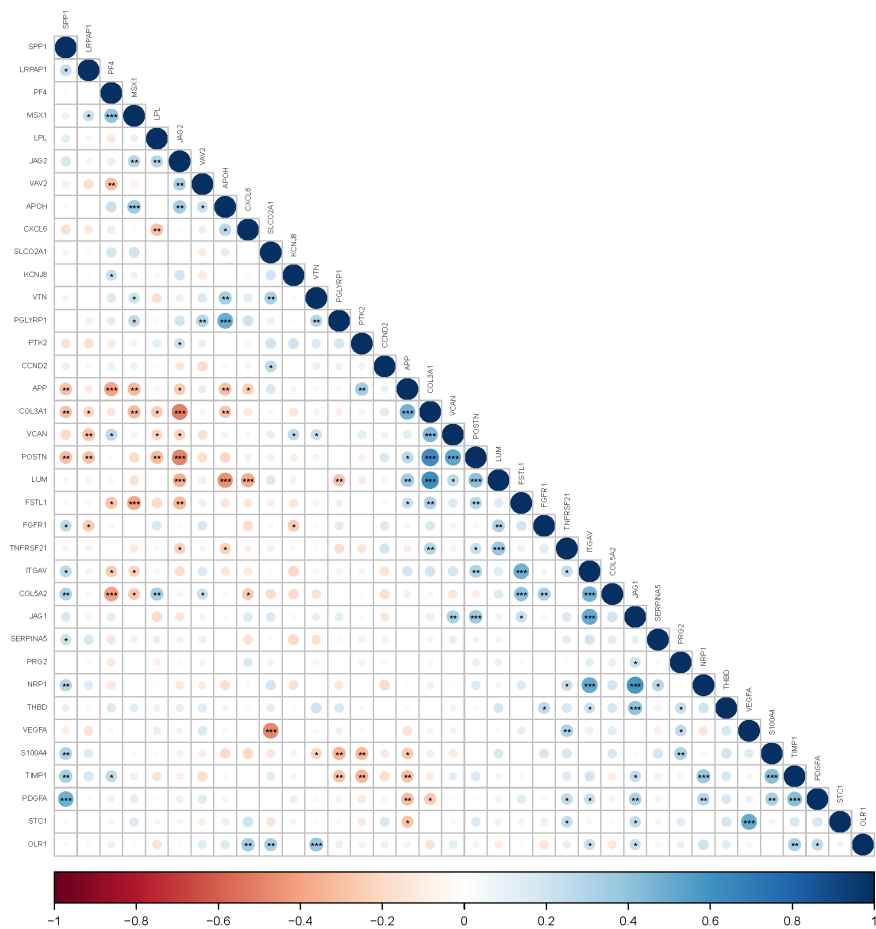

**Supplementary Figure 1. Correlation of angiogenesis genes in TARGET-OS database.**



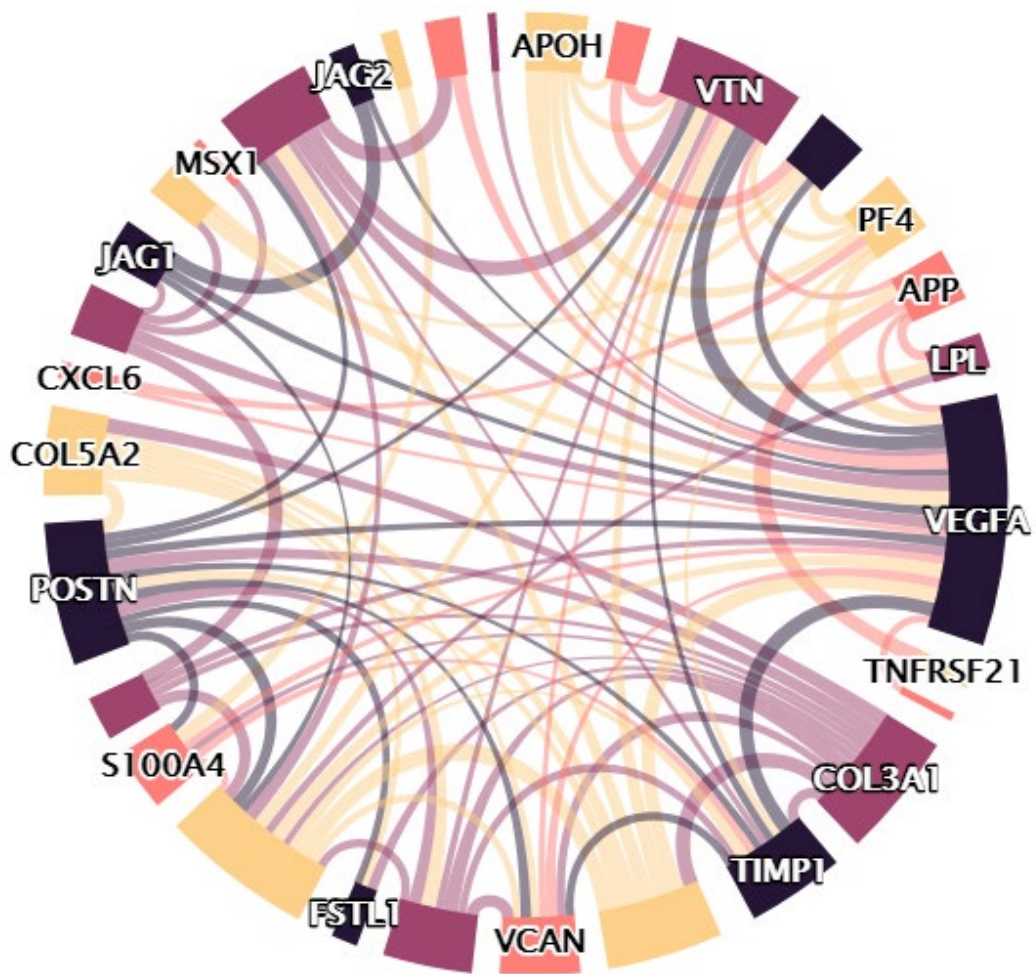

**Supplementary Figure 2. Interaction of angiogenesis genes in the TARGET-OS database.**

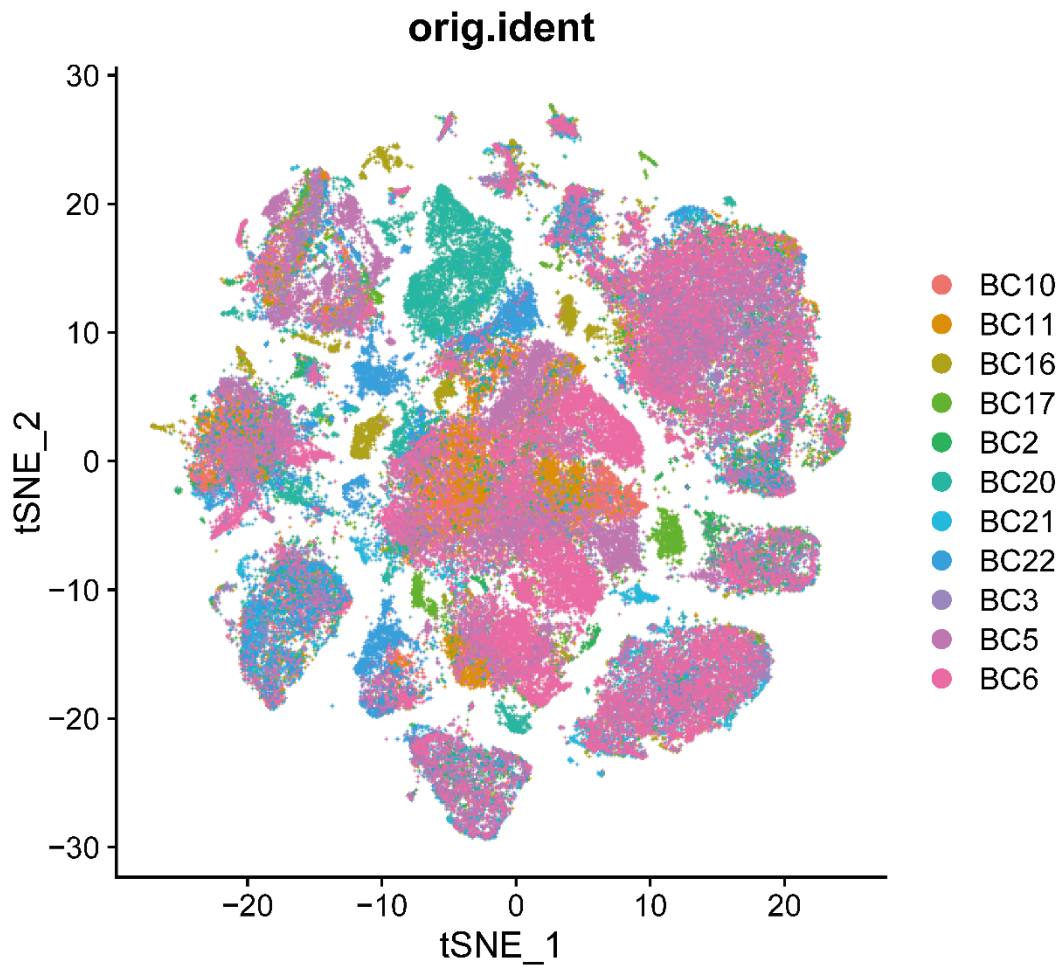

**Supplementary Figure 3. The t-SNE plot showing the batch effect after correction by harmony algorithm.**

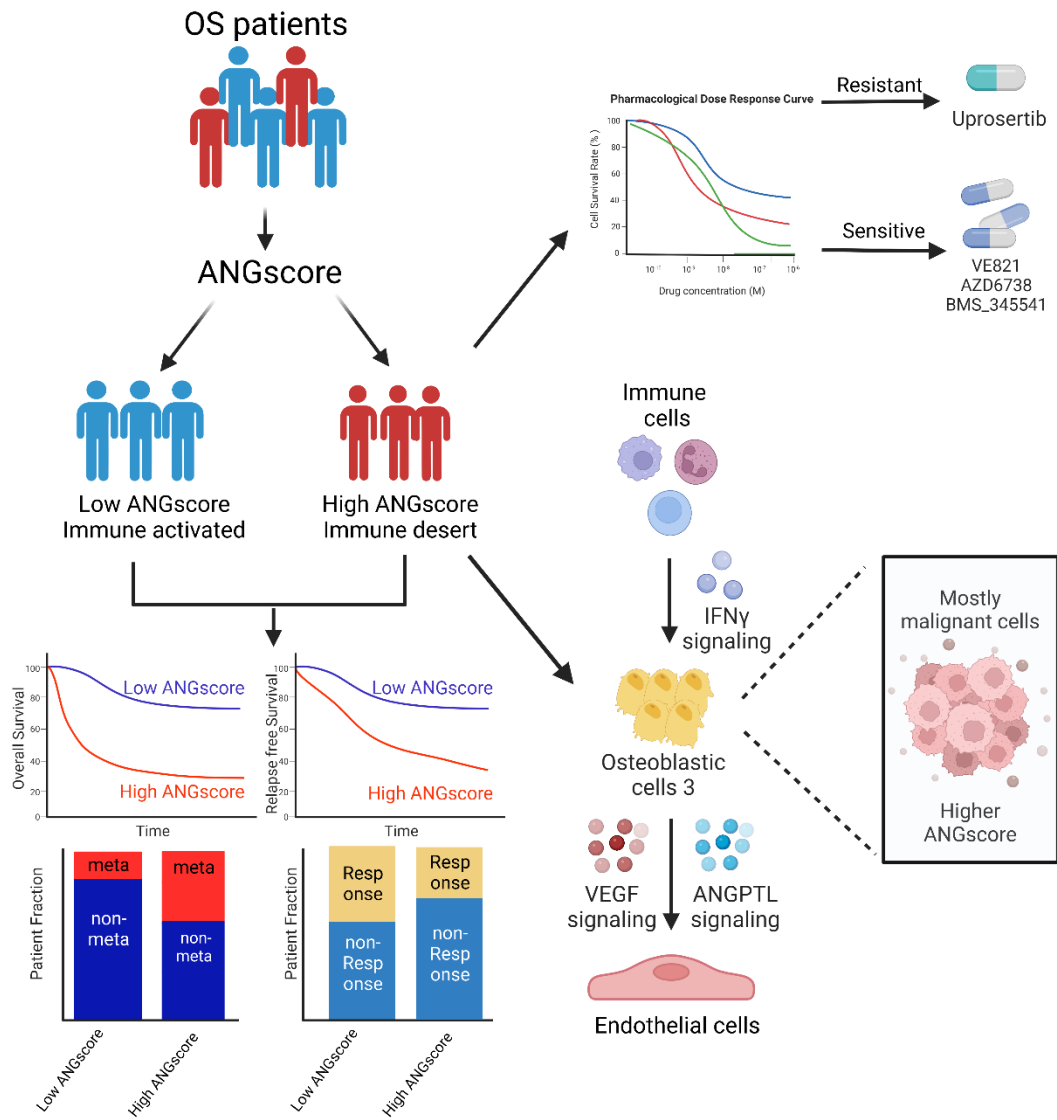

**Supplementary Figure 4. The mechanism figure of the study. (Created with Biorender.com)**
